# Supplementary material for: First scientific observation of the largest Sahulian rodent, Mallomys istapantap , in the wild
Source: publisher site journal article supplement (doi:10.1515/mammalia-2024-0153), 2025-04-18
Supplement: Supplementary file 1 [file j_mammalia-2024-0153_suppl_001.docx]

**Supplementary Material**

**First scientific observation of the largest Sahulian rodent, *Mallomys istapantap*, in the wild**

František Vejmělka

DOI 10.1515/mammalia-2024-0153

**Supplementary Video S1**

**Supplementary Figure 1:** A scanned painting of *Mallomys istapantap* from Flannery (1995) by P. Schouten. Reproduced with permission from P. Schouten and T. Flannery.

**Supplementary Figure 2:** The explored locality of Mt. Wilhelm around 3500 masl where the described individuals of *Mallomys istapantap* come from; and a happy author with the catch in its natural habitat (3700 masl).

**Supplementary Figure 3:** A place of recording of *Mallomys istapantap*. Note the worn vegetation on the upper side of the log indicating a frequent use. The same log can be seen in the middle of the lower image showing the habitat from a broader view.
